# Supplementary material for: Photocatalytic Activity of TiO2/g-C3N4 Nanocomposites for Removal of Monochlorophenols from Water
Source: MDPI journal article supplement (doi:10.3390/nano12162852), 2022-08-18
Supplement: s1 [file s1]

# Photocatalytic Activity of $\text{TiO}_2/\text{g-C}_3\text{N}_4$ Nanocomposites for Removal of Monochlorophenols from Water

Thawanrat Kobkeatthawin <sup>1</sup>, Suwilai Chaveanghong <sup>1</sup>, Jirawat Trakulmututa <sup>1</sup>, Taweechai Amornsakchai <sup>1,2</sup>, Puangrat Kajitvichyanukul <sup>3,4,\*</sup> and Siwaporn Meejoo Smith <sup>1,\*</sup>

<sup>1</sup> Center of Sustainable Energy and Green Materials and Department of Chemistry, Faculty of Science, Mahidol University, 999 Phuttamonthon Sai 4 Road, Salaya, Nakhon Pathom 73170, Thailand

<sup>2</sup> Center of Excellence for Innovation in Chemistry, 272 Rama VI Road, Rajthevi, Bangkok 10400, Thailand

<sup>3</sup> Department of Environmental Engineering, Faculty of Engineering, Chiang Mai University, 239 Huay Kaew Road, Muang District, Chiang Mai 5020, Thailand

<sup>4</sup> Sustainable Engineering Research Center for Pollution and Environmental Management, Faculty of Engineering, Chiang Mai University, 239 Huay Kaew Road, Muang District, Chiang Mai 50200, Thailand

\* Correspondence: puangrat.k@cmu.ac.th (P.K.); siwaporn.smi@mahidol.edu (S.M.S.); Tel.: +66-61-6598715 (P.K); +66-93-5939449 (S.M.S.)

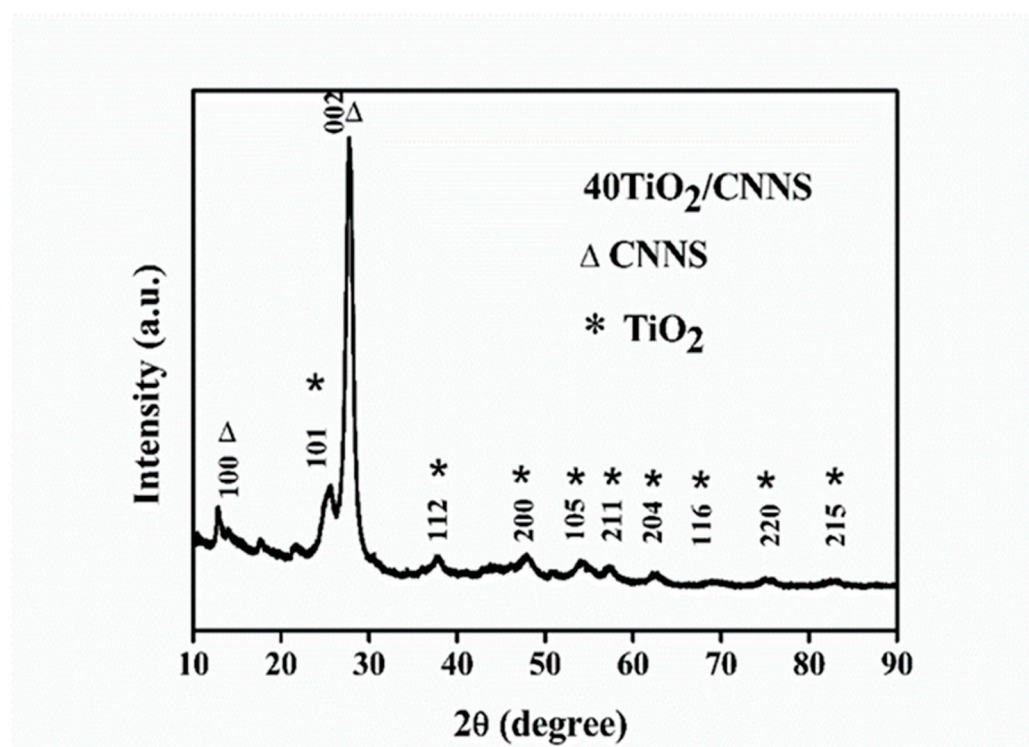

**Figure S1.** Enlarged powder X-ray diffraction profile of the 40TiO<sub>2</sub>/CNNS composite.

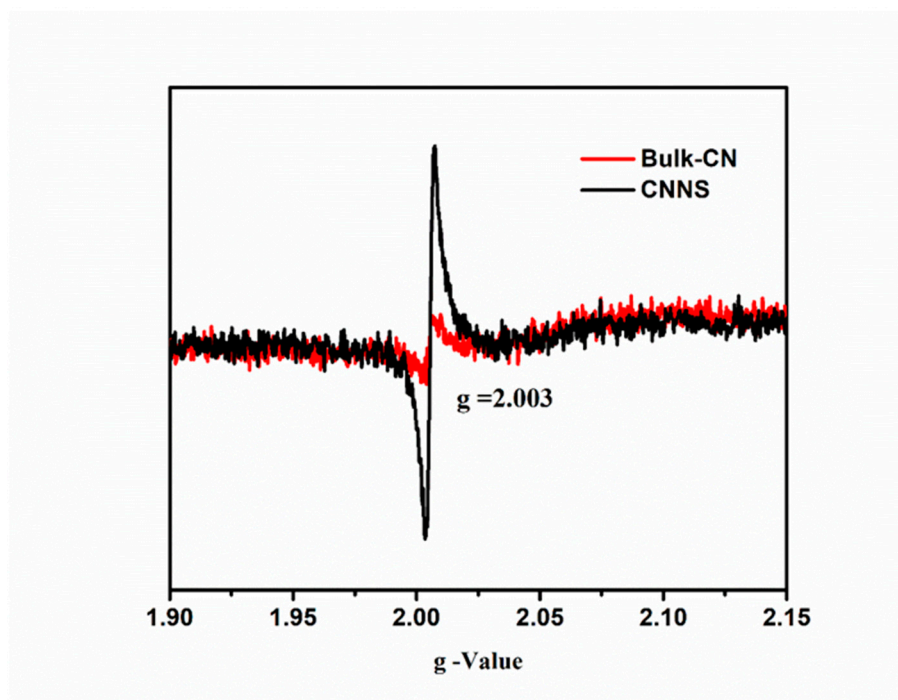

**Figure S2.** Solid phase ESR spectra of bulk-CN (red) and CNNS (black).

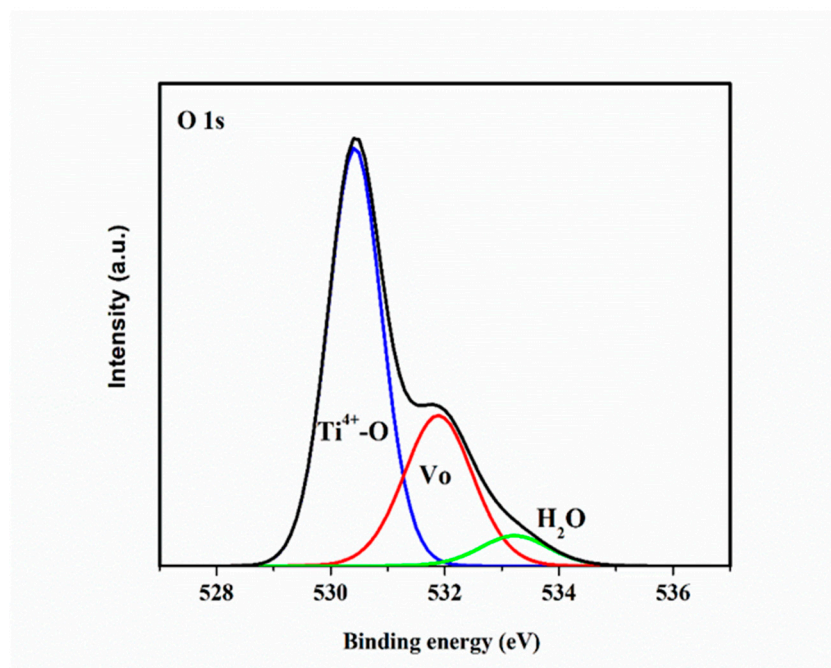

**Figure S3.** Convolution fitting for the O 1s XPS spectrum in TiO<sub>2</sub>.

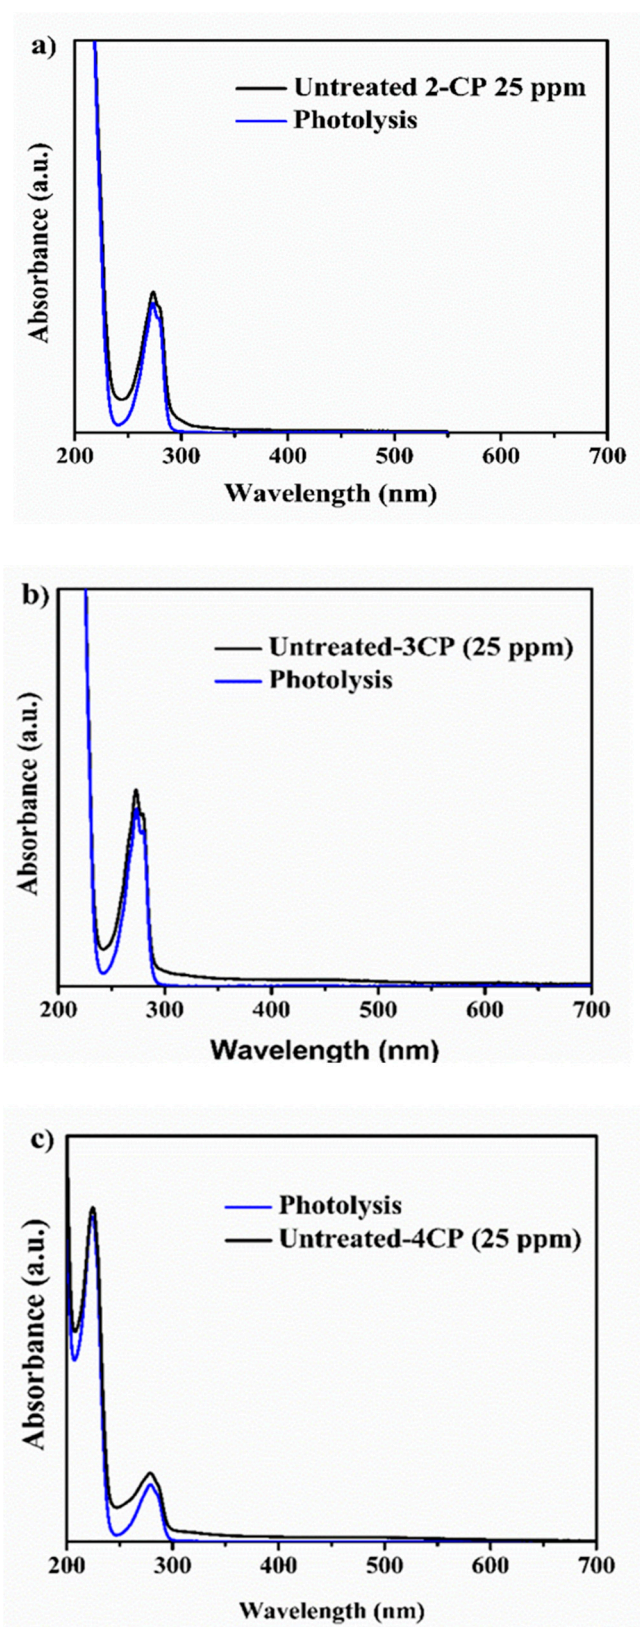

**Figure S4.** UV-vis spectra for photolysis of (a) 2-CP, (b) 3-CP and (c) 4-CP aqueous solutions in the absence of catalyst.



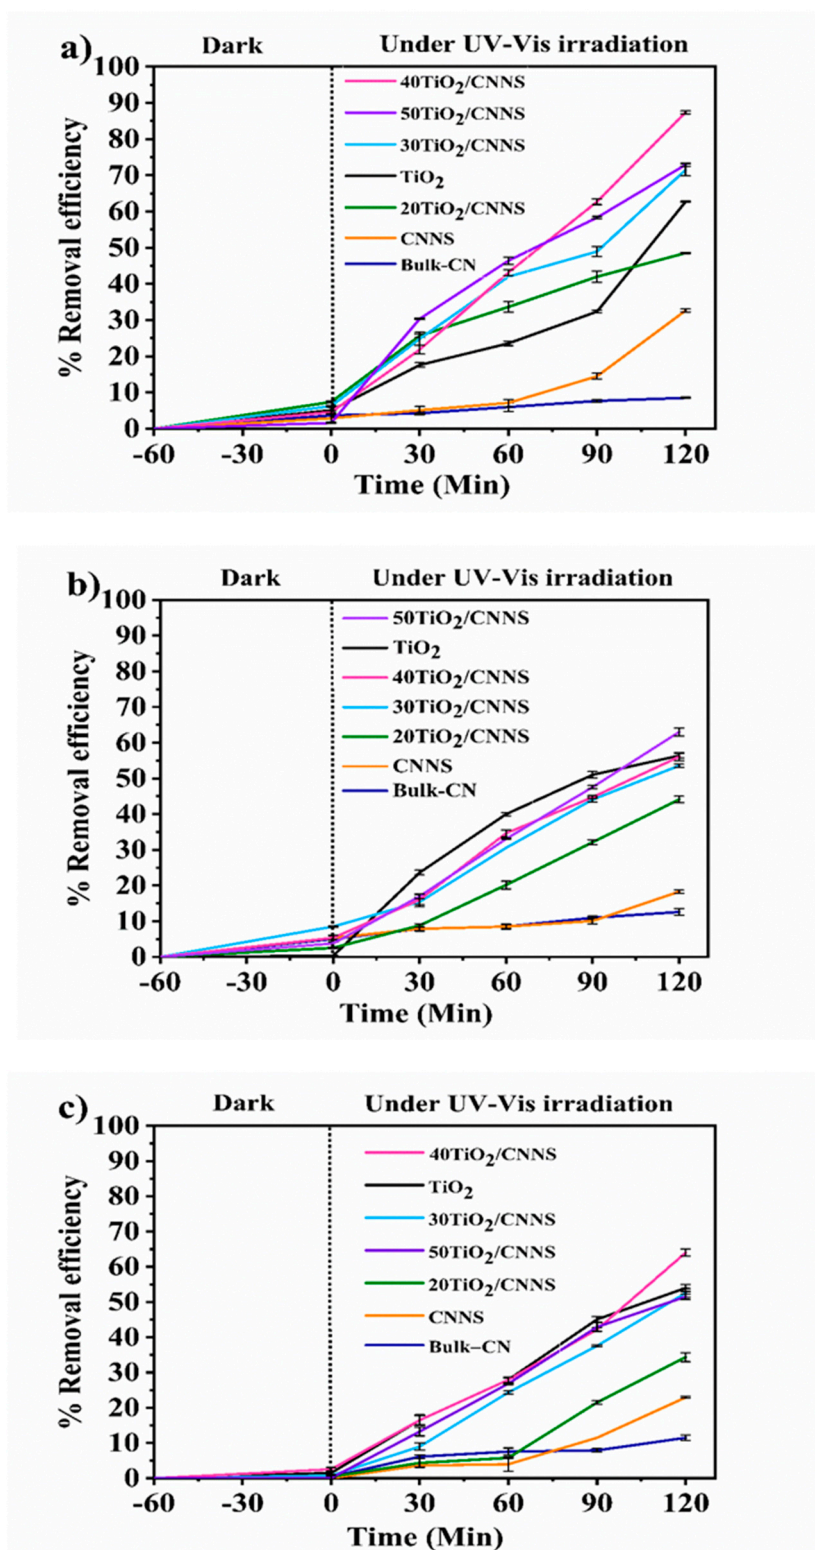

**Figure S5.** Time-dependent photocatalytic degradation of (a) 2-chlorophenol, (b) 3-chlorophenol, and (c) 4-chlorophenol when treated with g-C<sub>3</sub>N<sub>4</sub>, TiO<sub>2</sub> and composites under UV-Vis irradiation (25 ppm pollutant, 1g/L catalyst loading).

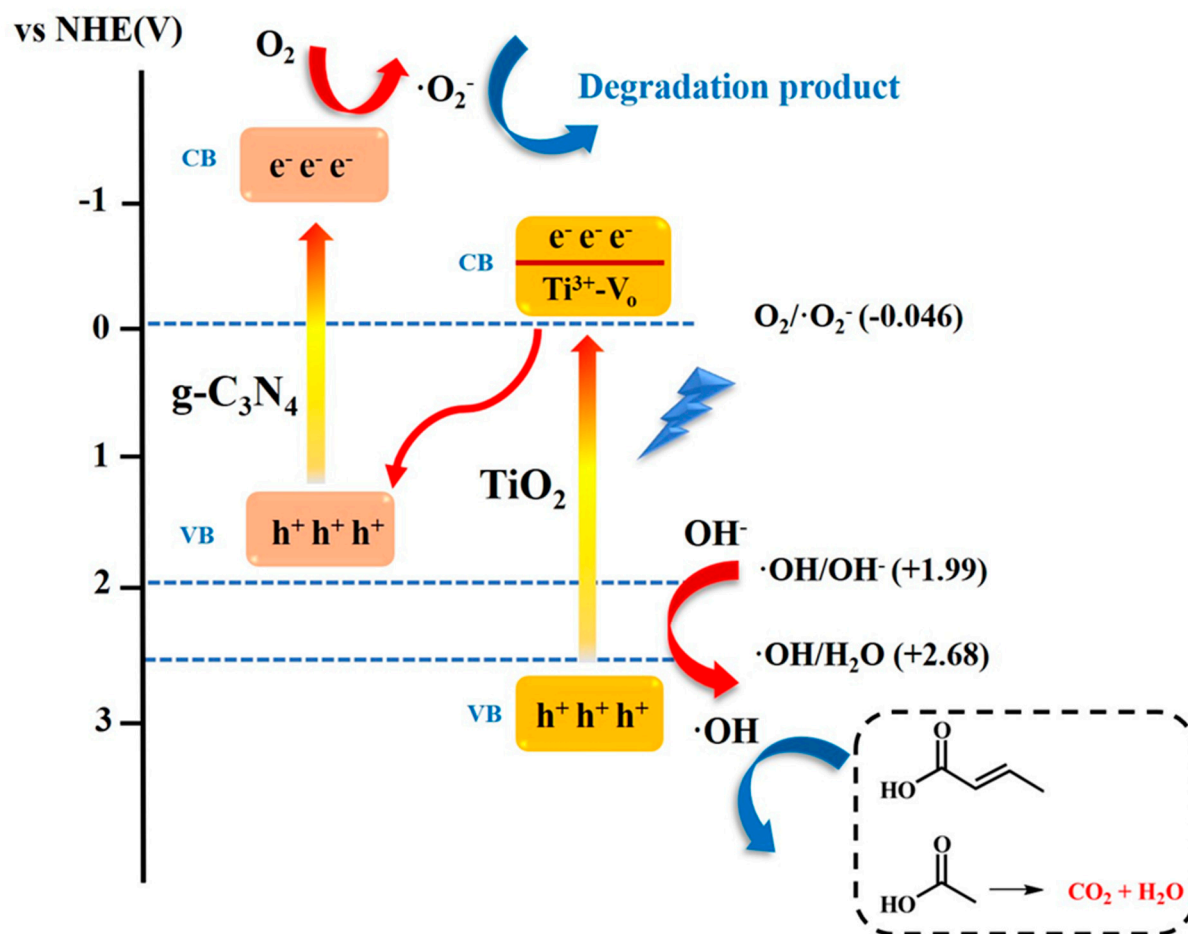

**Figure S6.** Photocatalytic mechanism of utilizing 40TiO<sub>2</sub>/CNNS for MCPs degradation.
